# Supplementary material for: The Men's Safer Sex (MenSS) trial: protocol for a pilot randomised controlled trial of an interactive digital intervention to increase condom use in men
Source: HighWire-hosted journal article supplement (doi:10.1136/bmjopen-2014-007552), 2015-02-01
Supplement: bmjopen-2014-007552supp_appendix2.pdf [file bmjopen-2014-007552supp_appendix2.pdf]

**The Men's Safer Sex (MenSS) Trial: protocol for a pilot randomized controlled trial of an interactive digital intervention to increase condom use in men**

Appendix 2: Full outcome questionnaire

1. In the last 3 months how many of these types of female partners have you had sex with?

Regular partner .....

Occasional partner, e.g. friends with benefits .....

One off partner (e.g. one night stand) .....

Sex worker (paid for) .....

Other .....

(please specify): .....

(Text boxes restricted to 3 digit number for each option; free text box for 'please specify')

2. In the last 3 months how many of these types of male partners have you had sex with?

Regular partner .....

Occasional partner, e.g. friends with benefits .....

One off partner (e.g. one night stand) .....

Sex worker (paid for) .....

Other .....

(please specify): .....

(Text boxes restricted to 3 digit number for each option; free text box for 'please specify')

3. In the last 3 months, how many **women** have you had **unprotected vaginal or anal sex** with (without a condom)?

*(Free text response, restricted to 3 digits numeric)*

4. In the last 3 months, how many **TIMES** have you had **unprotected vaginal or anal sex** with a **woman** (without a condom)? (Please answer as accurately as you can)

*(Free text response, restricted to 3 digits numeric)*

5. In the last 3 months, how many **men** have you had **unprotected anal sex** with (without a condom)?

*(Free text response, restricted to 3 digits numeric)*

6. In the last 3 months, how many times have you experienced any of the following problems?

Condoms not available when needed  0  1  2  3 or more

Using condoms stored in wallet more than 1 month  0  1  2  3 or more

Using condoms that were not lubricated  0  1  2  3 or more

Applied condom after sex had begun  0  1  2  3 or more

Removed condom before sex ended  0  1  2  3 or more

Did not change condoms when switching from one form of sex to another  0  1  2  3 or more

Erection lost when putting on a condom  0  1  2  3 or more

Erection lost during sex  0  1  2  3 or more

Condom broke  0  1  2  3 or more

Condom slipped off during sex  0  1  2  3 or more

Condom slipped off during withdrawal  0  1  2  3 or more

Ejaculate dripped onto partner's genitals  0  1  2  3 or more

Condom put on penis the wrong way, then turned and put on the right way  0  1  2  3 or more

Did not change condoms when switching from one partner to another  0  1  2  3 or more

7. In the last 3 months, how many times have you had **unprotected sex** (without a condom) because you were **drunk or high**? (Please answer as accurately as you can)

*(Free text response, restricted to 3 digits numeric)*

8. In the last 3 months, have you used these types of contraception with female partners ?

Tick all that apply

- Don't know
- None
- None –trying for a baby
- The Pill, contraceptive patch, or contraceptive vaginal ring
- Condoms (including female condoms)
- Emergency contraceptive pill (morning after pill)
- Injection
- Contraceptive implant
- Withdrawal (pulling out)
- Intrauterine device (coil/IUD/IUS)
- Diaphragm or cap or spermicide
- Natural family planning (safe period/rhythm method)

- Don't know name of the contraception
- Other (please state).....

9. In the last 3 months, have you had any of the following sexually transmitted infections (tick all that apply)?

- Warts
- Herpes
- Chlamydia
- Gonorrhoea
- Pubic lice (Crabs)
- Trichomonas (TV)
- Non-specific urethritis (NSU)
- Syphilis
- HIV
- Hepatitis
- Can't remember the name
- Other (please write in name)  
.....
- No sexually transmitted infections

10. In the last 3 months have you had antibiotic treatment because a partner had an STI?

Yes

No

11. Has a female partner been pregnant in the last 3 months?

Yes

No

Don't know

(If yes) What happened with the pregnancy?

Still pregnant

Miscarriage or stillbirth

An abortion

A baby

Don't know

12. In the last 3 months, how many times have you used each of these sexual health services?

Condom pick-up .....

**Self-test kit** for STIs\* (e.g. postal Chlamydia test kit) .....

**Urine tests/swabs** at the **GP** .....

**Urine tests/swabs** at a **sexual health clinic** .....

**Blood tests** for STIs at the **GP**) .....

**Blood tests** for STIs at a **sexual health clinic** .....

Treatment of an STI at the **GP** .....

Treatment of an STI at a **sexual health clinic**

Sexual health advice from the **GP** .....

Sexual health advice from a **sexual health clinic** .....

**Outreach** contraception and sexual service (CASH) .....

Sexual health counselling or therapy .....

Other sexual health services .....

(please state) .....

*(Text boxes restricted to 3 digit number for each option; free text box for 'please state')*

\*STIs = Sexually Transmitted Infections

\* GP = General practitioner, family doctor

13. I feel confident that I could:

Get hold of condoms (eg buying from a shop) strongly disagree disagree undecided agree strongly agree

Use a condom on correctly strongly disagree disagree undecided agree strongly agree

Put a condom on without losing my erection strongly disagree disagree undecided agree strongly agree

Remove and dispose of a condom after sex strongly disagree disagree undecided agree strongly agree

Choose the correct size/type of condom strongly disagree disagree undecided agree strongly agree

Discuss using condoms with any partner I might have strongly disagree disagree undecided agree strongly agree

Suggest using a condom with a new partner strongly disagree disagree undecided agree strongly agree

Suggest using a condom without my partner feeling 'diseased' strongly disagree disagree undecided agree strongly agree

Remember to use a condom even if I am drunk or high strongly disagree disagree undecided agree strongly agree

Stop to put a condom on myself or my partner even in the heat of the moment strongly disagree disagree undecided agree strongly agree

14. True or false?

Whether or not people get sexually transmitted infections (STIs) is just luck.

True  False  Unsure of answer

You would know if you had an STI, without needing a test

True  False  Unsure of answer

You can tell who is likely to have an STI

True  False  Unsure of answer

You can have HIV and not know

True  False  Unsure of answer

You can catch STIs from oral sex

True  False  Unsure of answer

If you are in a relationship, you are safe from catching STIs

True  False  Unsure of answer

You are less likely to catch an STI from someone you know

True  False  Unsure of answer

Some STIs can't be treated

True  False  Unsure of answer

With a condom on, the man should wait until the penis is soft before withdrawing after sex

True  False  Unsure of answer

Baby oil or Vaseline is a good lubricant to use on a condom

True  False  Unsure of answer

Standard sized condoms are suitable for all men

True  False  Unsure of answer

15. Thinking about situations when you will have sex in the future, which of the following best applies to you?

- I do not want to wear a condom
- I am not sure if I will want to wear a condom
- I might want to wear a condom
- I very much want to wear a condom

16. Which of the following best applies to you:

- I plan not to use condoms when I have sex
- I don't have any particular plans to use condoms when I have sex
- From now on I will try to use a condom as often as possible whenever I have sex
- From now on I will make sure I always use a condom whenever I have sex



17. Which of the following best applies to you?

- I think the disadvantages of using a condom are greater than the advantages
- I think there is little to choose between the advantages and disadvantages of using a condom
- I think the advantages of using a condom are a bit greater than the disadvantages
- I think the advantages of using a condom (e.g., protection against STIs and pregnancy) are always much greater than any disadvantages (e.g., reduced pleasure)

18. Do you agree or disagree with the following statements?

Condoms feel unnatural  strongly disagree  disagree  undecided  agree  strongly agree

Condoms interrupt the mood  strongly disagree  disagree  undecided  agree  strongly agree

Condoms don't feel good  strongly disagree  disagree  undecided  agree  strongly agree

Condoms reduce the quality of the climax or orgasm  strongly disagree  disagree  undecided  agree  strongly agree

Condoms are uncomfortable  strongly disagree  disagree  undecided  agree  strongly agree

Condoms don't fit right  strongly disagree  disagree  undecided  agree  strongly agree

I feel closer to my partner without a condom  strongly disagree  disagree  undecided  agree  strongly agree

Using a condom helps me worry less during sex  strongly disagree  disagree  undecided  agree  strongly agree

Using a condom helps my partner/s worry less during sex  strongly disagree  disagree  undecided  agree  strongly agree

19. During the last 3 months, have you discussed the following things with partner(s)?

How to prevent pregnancy  Yes  No

How to use condoms  Yes  No

How to prevent STIs and HIV  Yes  No

Your sex history  Yes  No

Their sex history  Yes  No

20. Do you agree or disagree with the following statements?

I feel I am a responsible person, which is why I use condoms  strongly disagree  disagree  undecided  agree  strongly agree

I feel I am a spontaneous person, which is why I don't use condoms  strongly disagree  disagree  undecided  agree  strongly agree

Using condoms is the woman's responsibility  strongly disagree  disagree  undecided  agree  strongly agree

Condoms make me feel less of a man  strongly disagree  disagree  undecided  agree  strongly agree

I use condoms because I am concerned about my health  strongly disagree  disagree  undecided  agree  strongly agree

I use condoms because I am concerned about my partners health  strongly disagree  disagree  undecided  agree  strongly agree

Getting a girl pregnant proves that I am a real man  strongly disagree  disagree  undecided  agree  strongly agree

21. We'd like to know about your sexual well-being over the last 3 months. Please select the statements that best apply to you.

**1. Sexual performance**

\_ Your sexual performance is good

\_ Your sexual performance is adequate

\_ Your sexual performance is sometimes inadequate

Your sexual performance is inadequate

## **2. Sexual relationship**

Your sexual relationship is never poor

Your sexual relationship is rarely poor

Your sexual relationship is sometimes poor

Your sexual relationship is always poor

## **3. Sexual anxiety**

Thinking about your sex life you never feel anxious

Thinking about your sex life you rarely feel anxious

Thinking about your sex life you sometimes feel anxious

Thinking about your sex life you always feel anxious

Under each heading, please tick the ONE box that best describes your health TODAY

### *22. Mobility (walking about)*

I have no problems walking about

I have some problems walking about

I have a lot of problems walking about

### *23. Looking after myself*

I have no problems washing or dressing myself

- I have some problems washing or dressing myself
- I have a lot of problems washing or dressing myself

24. Doing usual activities (for example, going to school, hobbies, sports, playing, doing things with family or friends)

- I have no problems doing my usual activities
- I have some problems doing my usual activities
- I have a lot of problems doing my usual activities

25. Having pain or discomfort

- I have no pain or discomfort
- I have some pain or discomfort
- I have a lot of pain or discomfort

26. Feeling worried, sad or unhappy

- I am not worried, sad or unhappy
- I am a bit worried, sad or unhappy
- I am very worried, sad or unhappy

We would like to know how good or bad your health is TODAY.

This line is numbered from 0 to 100.

100 means the best health you can imagine.

0 means the worst health you can imagine.

Please mark an X on the line that shows how good or bad your health is TODAY.

How good is your health TODAY

The best health you can imagine

100

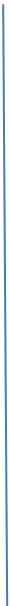

0

The worst health you can imagine

Has being a part of this study had any good or bad effects on your life? Please explain how:

[Free text comment box]
